# Supplementary material for: Bacterial Cellulose—Carboxymethylcellulose Composite Loaded with Turmeric Extract for Antimicrobial Wound Dressing Applications
Source: Int J Mol Sci. 2023 Jan 15;24(2):1719. doi: 10.3390/ijms24021719 (PMC9864671; doi:10.3390/ijms24021719)
Supplement: Supplementary file 1 [file ijms-24-01719-s001.zip]

Archive with 7 entries (7 files):
- Figure_S1.tif
- Figure_S2.tif
- Figure_S3.tif
- Figure_S4.tif
- Figure_S5.tif
- Figure_S6.tif
- Supplementary Material_ijms_2108242.pdf
